# Supplementary material for: Transcriptional and metabolic effects of glucose on Streptococcus pneumoniae sugar metabolism
Source: Front Microbiol. 2015 Oct 7;6:1041. doi: 10.3389/fmicb.2015.01041 (PMC4595796; doi:10.3389/fmicb.2015.01041)
Supplement: Supplementary file 2 [file Table2.XLSX]

## Sheet: Table S2
Table S2. Significantly differentially expressed genes (up- or downregulated) of cells of S. pneumoniae D39 grown in CDM supplemented with N-acetylglucosamine as compared to glucose grown cells, determined by DNA microarrays.
Amplicon	D39 locus_tag	Annotation_D39	Mna	Bayes.p	COG
SP1027	SPD_0913	hypothetical protein SPD_0913	1.80902	5.28e-08	S
SP1675	SPD_1488	ROK family protein	1.58395	1.04e-10	K
SP1676	SPD_1163	N-acetylneuraminate lyase, putative	1.38501	1.11e-09	E
SP0879	SPD_0775	hypothetical protein SPD_0775	1.31117	4.15e-09
SP1857	SPD_1638	cation efflux system protein	1.2014	1.47e-08	P
SP2240	SPD_2069	SpoJ protein	1.17577	6.19e-11	K
SP0107	SPD_0104	LysM domain-containing protein	1.13748	3.06e-09
SP1468	SPD_1297	pyridoxine biosynthesis protein	1.13471	3.97e-12	H
SP2239	SPD_2068	serine protease	1.05902	4.06e-12	O
SP1467	SPD_1296	glutamine amidotransferase subunit PdxT	1.03743	1e-12	H
SP1572	SPD_1402	non-heme iron-containing ferritin	0.969319	7.4e-12	P
SP1344	SPD_1179	hypothetical protein SPD_1179	0.877279	6.52e-12	R
SP0799	SPD_0702	sensor histidine kinase CiaH	0.870414	1.82e-07	T
SP1856	SPD_1637	transcriptional regulator, MerR family protein	0.864469	3.93e-06	K
SP0515	SPD_0458	heat-inducible transcription repressor	0.864174	1.96e-08	K
SP2186	SPD_2013	glycerol kinase	0.855798	1.63e-08	C
SP2185	SPD_2012	alpha-glycerophosphate oxidase	0.831916	2.07e-06	C
SP0965	SPD_0853	endo-beta-N-acetylglucosaminidase precursor, putative	0.824772	3.43e-08	R
SP0798	SPD_0701	DNA-binding response regulator CiaR	0.817707	1.82e-07	T
SP2183	SPD_2010	hypothetical protein SPD_2010	0.760449	7.36e-07
SP0517	SPD_0460	molecular chaperone DnaK	0.731996	2.81e-06	O
SP0516	SPD_0459	heat shock protein GrpE	0.728004	8.2e-07	O
SP1695	SPD_1506	acetyl xylan esterase, putative	0.718281	1.19e-09	Q
SP2106	SPD_1932	maltodextrin phosphorylase	0.717791	2.14e-07	G
SP1775	SPD_1566	hypothetical protein SPD_1566	0.716871	5.29e-07
SP1215	SPD_1075	transporter, FNT family protein, putative	0.682138	9.62e-08	P
SP1343	SPD_1178	prolyl oligopeptidase family protein	0.681016	2.94e-10	E
SPD_1074_3	SPD_1074	hypothetical protein SPD_1074	0.650546	3.91e-06	E
SP2107	SPD_1933	4-alpha-glucanotransferase	0.650431	3.19e-07	G
SP2206	SPD_2033	ribosomal subunit interface protein	0.634511	5.52e-10	J
SP1340	SPD_1175	hypothetical protein SPD_1175	0.621944	5.98e-10
SP1341	SPD_1176	ABC transporter, ATP-binding protein	0.598521	7.62e-10	V
SP2105	SPD_1931	hypothetical protein SPD_1931	0.583123	4.24e-07
SP1776	SPD_1567	thioredoxin	0.582872	1.12e-07	O
SP0726	SPD_0632	phosphomethylpyrimidine kinase	0.562023	1.87e-07	H
SP0267	SPD_0249	hypothetical protein SPD_0249	0.558212	2.86e-09	C
SP2173	SPD_2002	undecaprenol-phosphate-poly(glycerophosphate subunit) D-alanine transfer protein	0.549701	4.73e-08	M
SP0609	SPD_0530	amino acid ABC transporter, amino acid-binding protein	0.549383	4.62e-07	E
SP0617	SPD_0537	hypothetical protein SPD_0537	0.533587	4.68e-07	O
SP2055	SPD_1865	alcohol dehydrogenase, zinc-containing	0.531469	2.29e-08	E
SP0604	SPD_0525	sensor histidine kinase VncS	0.529135	2.4e-08	T
SP1907	SPD_1710	co-chaperonin GroES	0.526205	4.71e-07	O
SP0545	SPD_0473	immunity protein BlpY	0.519803	1.54e-07	R
SP2175	SPD_2004	protein DltB	0.505486	8.1e-08	M
SP0910	SPD_0803	hypothetical protein SPD_0803	0.497892	2.78e-07	K
SP1342	SPD_1177	drug efflux ABC transporter, ATP-binding/permease protein	0.476795	3.4e-07	V
SP0533	SPD_0046	bacteriocin BlpU	0.445815	1.45e-07
SP0603	SPD_0524	DNA-binding response regulator VncR	0.445569	4.48e-07	T
SP0607	SPD_0528	amino acid ABC transporter, permease protein	0.445505	7.16e-07	E
SP0981	SPD_0868	foldase protein PrsA	0.442598	1.88e-07	O
SP1284	SPD_1139	LemA protein	0.440551	9.68e-08	S
SP1714	SPD_1524	transcriptional regulator, GntR family protein	0.437174	2.46e-06	K
SP0057	SPD_0063	beta-N-acetylhexosaminidase	0.434236	2.54e-07	G
SP1307	SPD_1159	hypothetical protein SPD_1159	0.421299	1.16e-06
SPD_0087_3	SPD_0087	hypothetical protein SPD_0087	0.416038	1.45e-06
SP2102	SPD_1928	hypothetical protein SPD_1928	0.401048	1.72e-07
SP1283	SPD_1138	heat shock protein HtpX	0.394439	8.57e-07	O
SP1270	SPD_1126	alcohol dehydrogenase, zinc-containing	0.393729	3.78e-08	E
SP0764	SPD_0665	dihydroorotate dehydrogenase 1A	0.392012	4.08e-07	F
SP0765	SPD_0666	DNA polymerase III subunit delta	0.383892	3.91e-07	L
SP0820	SPD_0717	ATP-dependent Clp protease ATP-binding subunit ClpE	0.374604	1.38e-06	O
SP1715	SPD_1525	ABC transporter, ATP-binding protein	0.365663	2.7e-07	V
SP1051	SPD_0931	hypothetical protein SPD_0931	0.357434	2.51e-06	S
SP0923	SPD_0816	Cof family protein	0.357289	2.18e-06	R
SP2021	SPD_1830	glycosyl hydrolase, family protein 1	0.355459	2.47e-06	G
SP2174	SPD_2003	D-alanine--poly(phosphoribitol) ligase subunit 2	0.352491	2.6e-06	I
SP0098	SPD_0094	hypothetical protein SPD_0094	0.34435	4.69e-07
SP1591	SPD_1418	proline dipeptidase PepQ	0.336034	2.45e-06	E
SP2077	SPD_1904	arginine repressor	0.323838	2.1e-06	K
SP1717	SPD_1528	ABC transporter, ATP-binding protein	0.319184	3.68e-06	R
SP1232	SPD_1090	hypothetical protein SPD_1090	0.30664	3.07e-06	S
SP1231	SPD_1089	phosphopantothenoylcysteine decarboxylase	0.295655	2.26e-06	H
SP0391	SPD_0357	choline binding protein F	0.294963	3.34e-06	R
SP1182	SPD_1044	lactose phosphotransferase system repressor	0.287352	1.66e-06	K
SP1925	SPD_1728	hypothetical protein SPD_1728	-0.270446	1.84e-06
SP1154	SPD_1018	immunoglobulin A1 protease precursor	-0.302386	3.28e-06	S
SP0565	SPD_0491	hypothetical protein SPD_0491	-0.318032	2.83e-06	R
SP0626	SPD_0546	branched-chain amino acid transport system II carrier protein	-0.323219	1.91e-06	E
SP0568	SPD_0494	valyl-tRNA synthetase	-0.323318	8.25e-07	J
SP2126	SPD_1956	dihydroxy-acid dehydratase	-0.328649	4.21e-07	E
SP1022	SPD_0908	Sua5/YciO/YrdC/YwlC family protein	-0.329357	2.32e-06	J
SP1025	SPD_0911	hypothetical protein SPD_0911	-0.333178	5.42e-07
SP1924	SPD_1727	hypothetical protein SPD_1727	-0.333711	6.34e-07
SP0295	SPD_0275	30S ribosomal protein S9	-0.337531	3e-06	J
SP2225	SPD_2052	hypothetical protein SPD_2052	-0.340753	2.06e-06	R
SP2224	SPD_2051	peptidase, M16 family protein	-0.341609	1.69e-06	R
SP0227	SPD_0210	30S ribosomal protein S5	-0.348228	1.86e-06	J
SP0226	SPD_0209	50S ribosomal protein L18	-0.358335	1.17e-06	J
SP1923	SPD_1726	pneumolysin	-0.360574	1.22e-06
SP0210	SPD_0194	50S ribosomal protein L4	-0.361482	2.88e-07	J
SP0232	SPD_0215	translation initiation factor IF-1	-0.362388	1.45e-06	J
SP1754	SPD_1564	hypothetical protein SPD_1564	-0.362987	1.39e-06	S
SP2220	SPD_2047	cobalt transporter ATP-binding subunit	-0.364265	6.39e-07	P
SP1890	SPD_1670	oligopeptide ABC transporter, permease protein AmiC	-0.365717	1.87e-07	E
SP2064	SPD_1875	hydrolase, haloacid dehalogenase-like family protein	-0.370355	2.26e-06	R
SP0219	SPD_0203	50S ribosomal protein L14	-0.380397	5.92e-07	J
SP0216	SPD_0200	50S ribosomal protein L16	-0.380816	1.52e-07	J
SP2218	SPD_2045	rod shape-determining protein MreC	-0.382455	2.26e-06	M
SP0960	SPD_0848	50S ribosomal protein L35	-0.382542	1.86e-06	J
SP0731	SPD_0637	hypothetical protein SPD_0637	-0.383996	1.99e-07	S
SP0231	SPD_0214	adenylate kinase	-0.385427	9.2e-07	F
SP1033	SPD_0916	iron-compound ABC transporter, permease protein	-0.388601	6.09e-07	P
SP0566	SPD_0492	acetyltransferase, GNAT family protein	-0.390032	1.75e-06	J
SP2219	SPD_2046	cobalt ABC transporter, permease protein	-0.395374	1.96e-06	P
SP0749	SPD_0652	branched-chain amino acid ABC transporter, amino acid-binding protein	-0.396184	1.98e-06	E
SPD_0319_3	SPD_0319		-0.398861	1.6e-06	M
SP0217	SPD_0201	50S ribosomal protein L29	-0.398892	1.75e-06	J
SP0502	SPD_0448	glutamine synthetase, type I	-0.405811	2.95e-07	E
SP0501	SPD_0447	transcriptional regulator, MerR family protein	-0.406394	5.52e-07	K
SP0209	SPD_0193	50S ribosomal protein L3	-0.409298	1.11e-06	J
SP1357	SPD_1191	ABC transporter, ATP-binding/permease protein	-0.409818	1.27e-07	V
SP0228	SPD_0211	50S ribosomal protein L30	-0.419067	2.87e-06	J
SP0141	SPD_0144	transcriptional regulator	-0.422123	5.89e-08
SP1433	SPD_1262	transcriptional regulator, AraC family protein	-0.423275	7.11e-07	K
SP0775	SPD_0674	30S ribosomal protein S16	-0.433915	3.53e-07	J
SP0214	SPD_0198	50S ribosomal protein L22	-0.439393	1.08e-07	J
SP1850	SPD_1631	Dam-replacing family protein	-0.441563	3.92e-06
SP0220	SPD_0204	50S ribosomal protein L24	-0.450095	2.15e-07	J
SP1539	SPD_1368	30S ribosomal protein S18	-0.45042	3.38e-08	J
SP1778	SPD_1569	aquaporin	-0.453518	2.81e-08	G
SP0208	SPD_0192	30S ribosomal protein S10	-0.461043	1.28e-06	J
SP2134	SPD_1963	50S ribosomal protein L32	-0.466531	8.53e-08	J
SP0225	SPD_0208	50S ribosomal protein L6	-0.466607	5.84e-07	J
SP1891	SPD_1671	oligopeptide ABC transporter, oligopeptide-binding protein AmiA	-0.467215	4.72e-07	E
SP0222	SPD_0206	30S ribosomal protein S14	-0.46946	1.69e-06	J
SP0085	SPD_0083	30S ribosomal protein S4	-0.473104	1.66e-08	J
SP1872	SPD_1652	iron-compound ABC transporter, iron-compound-binding protein	-0.473172	7.02e-07	P
SP2217	SPD_2044	rod shpae-determining protein MreD, putative	-0.475101	1.01e-06	M
SP0218	SPD_0202	30S ribosomal protein S17	-0.481631	2.05e-08	J
SP0204	SPD_0189	acetyltransferase, GNAT family protein	-0.482503	2.76e-07	R
SP0230	SPD_0213	preprotein translocase subunit SecY	-0.483609	3.27e-07	U
SP0752	SPD_0655	branched-chain amino acid ABC transporter, ATP-binding protein	-0.486023	1.45e-08	E
SP1887	SPD_1667	oligopeptide ABC transporter, ATP-binding protein AmiF	-0.48812	2.21e-08	R
SP0205	SPD_0190	anaerobic ribonucleoside-triphosphate reductase activating protein	-0.494055	2.95e-08	O
SPD_0321_3	SPD_0321	glycosyl transferase, group 2 family protein	-0.498197	6.14e-08	M
SP0288	SPD_0268	hypothetical protein SPD_0268	-0.505809	1.72e-07	R
SP1002	SPD_0888	adhesion lipoprotein	-0.506071	8.31e-09	P
SPD_0322_3	SPD_0322	glycosyl transferase, group 1 family protein	-0.508675	5.94e-08	M
SP0206	SPD_0191	hypothetical protein SPD_0191	-0.51388	2.57e-08	F
SP0856	SPD_0749	branched-chain amino acid aminotransferase	-0.520699	2.63e-09	E
SP1888	SPD_1668	oligopeptide ABC transporter, ATP-binding protein AmiE	-0.520741	1.16e-08	E
SP1870	SPD_1650	iron-compound ABC transporter, permease protein	-0.523625	2.35e-06	P
SP0207	SPD_0191	hypothetical protein SPD_0191	-0.525488	8.15e-08	F
SP0751	SPD_0654	branched-chain amino acid ABC transporter, permease protein	-0.535973	8.96e-09	E
SP0213	SPD_0197	30S ribosomal protein S19	-0.53796	3.78e-08	J
SP1889	SPD_1669	oligopeptide ABC transporter, permease protein AmiD	-0.54278	4.88e-09	E
SP1355	SPD_1188	50S ribosomal protein L10	-0.544837	3.96e-09	J
SP0916	SPD_0809	lysine decarboxylase	-0.546161	4.85e-08	E
SP0921	SPD_0814	hypothetical protein SPD_0814	-0.548832	9.48e-07	E
SP1825	SPD_1608	ABC transporter ATP-binding protein	-0.549027	1.58e-07	E
SP1823	SPD_1606	MgtC/SapB family protein	-0.549279	1.12e-06	S
SP1119	SPD_1004	glyceraldehyde-3-phosphate dehydrogenase, NADP-dependent	-0.55487	9.58e-08	C
SP0919	SPD_0812	hypothetical protein SPD_0812	-0.558345	1.56e-06	E
SP1249	SPD_1107	guanosine 5'-monophosphate oxidoreductase	-0.560899	1.04e-08	F
SP1069	SPD_0954	hypothetical protein SPD_0954	-0.56624	7.12e-07	R
SP0753	SPD_0656	branched-chain amino acid ABC transporter, ATP-binding protein	-0.573281	1.34e-09	E
SP0922	SPD_0815	hydrolase, carbon-nitrogen family protein	-0.574167	1.57e-06	R
SPD_2038_3	SPD_2038	hypothetical protein SPD_2038	-0.593623	2.41e-08
SP1354	SPD_1187	50S ribosomal protein L7/L12	-0.600387	3.88e-08	J
SP0859	SPD_0752	hypothetical protein SPD_0752	-0.609127	9.06e-09	S
SP0961	SPD_0849	50S ribosomal protein L20	-0.612396	4.93e-07	J
SP0758	SPD_0661	PTS system, IIABC components	-0.614726	2.71e-08	G
SP0577	SPD_0502	PTS system, beta-glucosides-specific IIABC components	-0.654243	3.7e-06	G
SP1013	SPD_0900	aspartate-semialdehyde dehydrogenase	-0.675737	3.19e-07	E
SP0858	SPD_0751	hypothetical protein SPD_0751	-0.681503	1.1e-08	S
SP1014	SPD_0901	dihydrodipicolinate synthase	-0.681979	5.98e-08	E
SP0776	SPD_0675	hypothetical protein SPD_0675	-0.689041	3.48e-07	R
SP1824	SPD_1607	ABC transporter, permease protein	-0.693265	5.3e-10	P
SP0860	SPD_0753	pyrrolidone-carboxylate peptidase	-0.693963	1.87e-10	O
SP1816	SPD_1601	anthranilate synthase component II	-0.700864	5.95e-09	E
SP1811	SPD_1596	tryptophan synthase subunit alpha	-0.70567	8.72e-10	E
SP1817	SPD_1602	anthranilate synthase component I	-0.711637	6.73e-07	E
SP1815	SPD_1600	anthranilate phosphoribosyltransferase	-0.725881	6.6e-08	E
SP1071	SPD_0956	ABC transporter, ATP-binding protein	-0.729716	2.49e-06	R
SP0159	SPD_0161	hypothetical protein SPD_0161	-0.729949	1.21e-08	P
SP1004	SPD_0890	pneumococcal histidine triad protein E precursor	-0.732432	4.06e-08
SP0882	SPD_0778	hypothetical protein SPD_0778	-0.752765	6.19e-08	R
SP0962	SPD_0850	lactoylglutathione lyase	-0.762415	8.17e-09	E
SP1070	SPD_0955	amino acid or sugar ABC transport systems, permease protein	-0.769743	1.15e-06	R
SP1813	SPD_1598	N-(5'-phosphoribosyl)anthranilate isomerase	-0.797281	8.67e-08	E
SP0884	SPD_0780	hypothetical protein SPD_0780	-0.801458	2.51e-07	S
SP0885	SPD_0781	hypothetical protein SPD_0781	-0.879255	1.35e-08	I
SP0728	SPD_0634	hypothetical protein SPD_0634	-0.886897	1.42e-06	S
SP2125	SPD_1954	hypothetical protein SPD_1954	-0.900836	3.39e-10	R
SP0447	SPD_0406	ketol-acid reductoisomerase	-0.993987	2.76e-12	E
SP0445	SPD_0404	acetolactate synthase catalytic subunit	-1.01977	6.77e-13	E
SP0727	SPD_0633	transcriptional regulator, putative	-1.03293	3.61e-07	K
SP0446	SPD_0405	acetolactate synthase 3 regulatory subunit	-1.08678	3.19e-10	E
SP0448	SPD_0407	hypothetical protein SPD_0407	-1.10075	4.21e-10
SP0366	SPD_0334	oligopeptide ABC transporter, oligopeptide-binding protein AliA	-1.10216	4.27e-13	E
SP0304	SPD_0278	hypothetical protein SPD_0278	-1.21141	7.26e-07	S
SP0450	SPD_0409	threonine dehydratase	-1.25065	8.27e-13	E
SP0449	SPD_0408	hypothetical protein SPD_0408	-1.33029	1.34e-13
SP0310	SPD_0283	cellobiose phosphotransferase system IIC component	-1.91466	4.91e-08	G
SP0306	SPD_0280	transcriptional regulator, putative	-1.99551	4.44e-16	K
SP0305	SPD_0279	cellobiose phosphotransferase system IIB component	-2.12541	2.66e-15	G
SP0308	SPD_0281	cellobiose phosphotransferase system IIA component	-2.29868	1.49e-09	G
SP0309	SPD_0282	hypothetical protein SPD_0282	-2.38781	1.04e-09
SP0303	SPD_0277	6-phospho-beta-glucosidase	-2.67833	4.44e-16	G
a Values of ln-ratio. Positive values indicate upregulation and negative values indicate downregulation.
