# Supplementary material for: Transcriptional and metabolic effects of glucose on Streptococcus pneumoniae sugar metabolism
Source: Front Microbiol. 2015 Oct 7;6:1041. doi: 10.3389/fmicb.2015.01041 (PMC4595796; doi:10.3389/fmicb.2015.01041)
Supplement: Supplementary file 9 [file Table9.XLSX]

## Sheet: Table S9
Table S9. Significantly differentially expressed genes (up- or downregulated) of cells of S. pneumoniae D39 grown in CDM supplemented with mannose challenged with a Glc pulse (at mid-exponential phase of growth) as compared to unchallenged cells, determined by DNA microarrays.
Amplicon	D39 locus_tag	Annotation_D39	Mna	Bayes.p	COG
SP0704	SPD_0611	hypothetical protein SPD_0611	2.41013	0
SP0044	SPD_0051	phosphoribosylaminoimidazole-succinocarboxamide synthase	1.87204	5.28e-13	F
SP0090	SPD_0088	ABC transporter, permease protein	1.83096	2.84e-12	G
SP1121	SPD_1005	glycogen branching enzyme	1.82108	6.77e-15	G
SP0705	SPD_0612	hypothetical protein SPD_0612	1.80036	3.35e-14
SP0686	SPD_0596	hypothetical protein SPD_0596	1.64455	5.29e-12	S
SP1683	SPD_1495	sugar ABC transporter, sugar-binding protein	1.6201	5.11e-15	G
SP0091	SPD_0089	ABC transporter, permease protein	1.60043	1.99e-12	G
SP1679	SPD_1491	hypothetical protein SPD_1491	1.50896	3.09e-14
SP0684	SPD_0595	hypothetical protein SPD_0595	1.41852	3.76e-09
SP2182	SPD_2009	hypothetical protein SPD_2009	1.37285	9.02e-14
SP1684	SPD_1496	PTS system, IIBC components	1.36013	9.59e-11	G
SP0646	SPD_0560	PTS system, IIB component, putative	1.30844	2.07e-08	G
SP0545	SPD_0473	immunity protein BlpY	1.22298	2.43e-11	R
SP0706	SPD_0613	hypothetical protein SPD_0613	1.1881	5.44e-09
SP1197	SPD_1057	PTS system, IIB component, putative	1.13879	6.98e-13	G
SP0057	SPD_0063	beta-N-acetylhexosaminidase	1.11451	1.81e-09	G
SP0645	SPD_0559	PTS system IIA component, putative	1.10689	7.49e-09	G
SP1694	SPD_1505	hypothetical protein SPD_1505	1.10363	3e-10
SP0647	SPD_0561	PTS system, IIC component, putative	1.09846	1.08e-11	G
SP1681	SPD_1493	sugar ABC transporter, permease protein	1.09444	4.35e-13	G
SP2055	SPD_1865	alcohol dehydrogenase, zinc-containing	1.08412	3.56e-13	E
SP0051	SPD_0058	phosphoribosylamine--glycine ligase	1.07281	3.28e-09	F
SP1122	SPD_1006	glucose-1-phosphate adenylyltransferase	1.05066	6.93e-13	G
SP0498	SPD_0444	endo-beta-N-acetylglucosaminidase, putative	1.04412	3.76e-09	G
SP1682	SPD_1494	sugar ABC transporter, permease protein	1.0369	2.57e-13	G
SP1680	SPD_1492	hypothetical protein SPD_1492	1.02218	1.42e-12	G
SP0828	SPD_0723	ribose-5-phosphate isomerase A	1.02046	7.85e-11	G
SP0287	SPD_0267	xanthine/uracil permease family protein	1.02036	3.33e-11	R
SP0268	SPD_0250	pullulanase, extracellular	1.00371	1.01e-11	G
SP1847	SPD_1628	xanthine phosphoribosyltransferase	0.983418	1.95e-10	F
SP0715	SPD_0621	lactate oxidase	0.981953	2.04e-11	C
SP0097	SPD_0093	hypothetical protein SPD_0093	0.97907	5.14e-12
SP0875	SPD_0771	lactose phosphotransferase system repressor	0.97759	3.07e-12	K
SP0829	SPD_0724	phosphopentomutase	0.972242	4.88e-14	G
SP0876	SPD_0772	1-phosphofructokinase, putative	0.968984	5.27e-12	G
SP0096	SPD_0092	hypothetical protein SPD_0092	0.968009	1.03e-11
SPD_1299_3	SPD_1299	hypothetical protein SPD_1299	0.961252	6.64e-09
SP0115	SPD_0116	hypothetical protein SPD_0116	0.951343	4.86e-11
SP1677	SPD_1490	hypothetical protein SPD_1490	0.945162	1.84e-11
SP2108	SPD_1934	maltose/maltodextrin ABC transporter, maltose/maltodextrin-binding protein	0.93593	6.54e-12	G
SP2144	SPD_1972	hypothetical protein SPD_1972	0.933785	2.32e-10	S
SP1215	SPD_1075	transporter, FNT family protein, putative	0.917552	4.86e-12	P
SP1685	SPD_1497	N-acetylmannosamine-6-phosphate 2-epimerase	0.878969	3.24e-10	G
SP1580	SPD_1409	sugar ABC transporter, ATP-binding protein	0.863846	1.03e-12	G
SP0547	SPD_0475	CAAX amino terminal protease family protein	0.847486	1.97e-08
SP1676	SPD_1163	N-acetylneuraminate lyase, putative	0.846398	5.06e-12	E
SP1471	SPD_1301	NADPH-dependent FMN reductase	0.832721	1.09e-10	R
SP1996	SPD_1793	universal stress protein family protein	0.830379	3.24e-10	T
SP1675	SPD_1488	ROK family protein	0.82906	2.62e-11	K
SP1775	SPD_1566	hypothetical protein SPD_1566	0.81183	8.74e-12
SP1097	SPD_0982	pyrophosphokinase family protein	0.809954	1.36e-11	S
SP1098	SPD_0983	inorganic polyphosphate/ATP-NAD kinase	0.799545	7.8e-12	G
SP0830	SPD_0725		0.777805	3.66e-11
SP2072	SPD_1899	glutamine amidotransferase, class 1	0.771102	3e-11	R
SP1202	SPD_1062	DNA repair protein RecN	0.769905	1.32e-10	L
SP1853	SPD_1634	galactokinase	0.769476	3.04e-09	G
SP0409	SPD_0373	hypothetical protein SPD_0373	0.75931	6e-10	S
SP2071	SPD_1898	hypothetical protein SPD_1898	0.748706	7.51e-08
SP0685	SPD_0595	hypothetical protein SPD_0595	0.744915	7.95e-08
SP0832	SPD_0727	hypothetical protein SPD_0727	0.744701	4.2e-09
SP1976	SPD_1774	pyruvate formate-lyase activating enzyme	0.72743	2.07e-10	O
SP0831	SPD_0726	purine nucleoside phosphorylase	0.721813	2.89e-11	F
SP0155	SPD_0157	sensor histidine kinase, putative	0.720694	5.54e-08	T
SP2143	SPD_1971	hypothetical protein SPD_1971	0.715568	1.95e-07	G
SP0648	SPD_0562	beta-galactosidase precursor, putative	0.707656	5.43e-11	G
SP0100	SPD_0096	hypothetical protein SPD_0096	0.70624	4.9e-10	K
SP1201	SPD_1061	serine/threonine protein phosphatase	0.705713	4.71e-11	T
SP0459	SPD_0420	formate acetyltransferase	0.701982	1.04e-08	C
SP1659	SPD_1472	isoleucyl-tRNA synthetase	0.698084	9.35e-11	J
SP0098	SPD_0094	hypothetical protein SPD_0094	0.685489	7.95e-12
SP1206	SPD_1066	exodeoxyribonuclease VII small subunit	0.684541	5.05e-09	L
SP1278	SPD_1134	pyrimidine regulatory protein PyrR	0.683944	5.03e-10	F
SP1203	SPD_1063	transcriptional regulator of arginine metabolism expression, putative	0.672258	5.93e-10	K
SP0835	SPD_0730	purine nucleoside phosphorylase	0.669174	4.11e-08	F
SP1277	SPD_1133	aspartate carbamoyltransferase catalytic subunit	0.664558	7.42e-09	F
SP0110	SPD_0107	membrnae protein, putative	0.664194	3.49e-09
SP1415	SPD_1246	glucosamine-6-phosphate isomerase	0.659272	8.23e-12	G
SP0546	SPD_0474	hypothetical protein SPD_0474	0.648008	6.84e-08
SP0754	SPD_0657	acetoin utilization protein AcuB, putative	0.643289	5.14e-09	K
SP0060	SPD_0065	Beta-galactosidase 3	0.642267	2.58e-09	G
SP1099	SPD_0984	ribosomal large subunit pseudouridine synthase, RluD subfamily protein	0.641559	3.5e-10	J
SP0318	SPD_0290	carbohydrate kinase, PfkB family protein	0.625734	9.8e-08	G
SP1041	SPD_0922	hypothetical protein SPD_0922	0.620917	2.83e-09
SP0695	SPD_0604	HesA/MoeB/ThiF family protein	0.619325	7.57e-07	H
SP0698	SPD_0606	hypothetical protein SPD_0606	0.618286	2.15e-07
SP0919	SPD_0812	hypothetical protein SPD_0812	0.618156	3.86e-10	E
SP1470	SPD_1300	thiamine biosynthesis protein ApbE, putative	0.612871	3.37e-09	H
SP0877	SPD_0773	PTS system, fructose specific IIABC components	0.602163	5.88e-10	G
SP0920	SPD_0813	carboxynorspermidine decarboxylase	0.600625	3.43e-09	E
SP0921	SPD_0814	hypothetical protein SPD_0814	0.600257	4.94e-09	E
SP1861	SPD_1643	choline transporter	0.598646	8.26e-10	E
SP1276	SPD_1132	carbamoyl phosphate synthase small subunit	0.597342	2.72e-10	E
SP2187	SPD_2014	hypothetical protein SPD_2014	0.590582	4.33e-08	K
SP1863	SPD_1645	transcriptional regulator, MarR family protein	0.583888	3.16e-10	K
SP0325	SPD_0297	PTS system, IID component	0.582992	1.18e-07	G
SP1686	SPD_1498	putative oxidoreductase	0.58178	9.04e-08	R
SP1204	SPD_1064	hemolysin A, putative	0.581236	2.51e-08	J
SP1848	SPD_1629	xanthine permease	0.578084	4.41e-08	F
SP1040	SPD_0921	site-specific recombinase, resolvase family protein	0.569307	1.18e-08	L
SP0319	SPD_0291	hypothetical protein SPD_0291	0.567234	4.94e-08	G
SP0099	SPD_0095	hypothetical protein SPD_0095	0.561924	2.47e-10	S
SP1275	SPD_1131	carbamoyl phosphate synthase large subunit	0.560746	2.61e-10	E
SP1999	SPD_1797	catabolite control protein A	0.560323	1.05e-10	K
SP0285	SPD_0265	alcohol dehydrogenase	0.559566	9.1e-08	R
SP0918	SPD_0811	spermidine synthase	0.558406	1.43e-09	E
SP1776	SPD_1567	thioredoxin	0.557694	2.18e-09	O
SP1100	SPD_0985	phosphotransacetylase	0.557082	1.34e-09	C
SP2148	SPD_1975		0.548933	3.47e-08
SP0111	SPD_0108	amino acid ABC transporter, ATP-binding protein, putative	0.54758	1.59e-08	V
SP0284	SPD_0264	PTS system, mannose-specific IIAB components	0.546184	5.28e-10	G
SP0833	SPD_0727	hypothetical protein SPD_0727	0.54038	1.4e-09
SP1205	SPD_1065	geranyltranstransferase	0.53784	3.8e-10	H
SP1082	SPD_0968	acetyltransferase, GNAT family protein	0.535538	8.67e-09	J
SP2026	SPD_1834	bifunctional acetaldehyde-CoA/alcohol dehydrogenase	0.529132	3.14e-07	C
SP1862	SPD_1644	hypothetical protein SPD_1644	0.52653	1.56e-09	S
SP1083	SPD_0969	hypothetical protein SPD_0969	0.519767	3.06e-09	K
SP1207	SPD_1067	exodeoxyribonuclease VII large subunit	0.517981	3.48e-09	L
SP1200	SPD_1060	GTP-binding protein LepA	0.51759	3.5e-09	M
SP1035	SPD_0918	iron-compound ABC transporter, ATP-binding protein	0.510426	1.05e-07	P
SP1472	SPD_1302	oxidoreductase, putative	0.503184	3.77e-07	S
SP1038	SPD_0919	hypothetical protein SPD_0919	0.498896	8.83e-09
SP0321	SPD_0293	PTS system, IIA component	0.484956	2.86e-07	G
SP0834	SPD_0729	hemolysin-related protein	0.483844	1.76e-08
SP0006	SPD_0006	transcription-repair coupling factor	0.482078	5.23e-08	L
SP2109	SPD_1935	maltodextrin ABC transporter, permease protein	0.481538	5.31e-07	G
SP1154	SPD_1018	immunoglobulin A1 protease precursor	0.481207	2.21e-09	S
SP0494	SPD_0442	CTP synthetase	0.475536	9.59e-10	F
SP2220	SPD_2047	cobalt transporter ATP-binding subunit	0.471511	4.44e-09	P
SP0641	SPD_0558	cell wall-associated serine protease PrtA	0.465476	2.96e-08	O
SP0841	SPD_0735	methyltransferase small subunit	0.459589	2e-08	J
SP0726	SPD_0632	phosphomethylpyrimidine kinase	0.455801	4.23e-07	H
SP0595	SPD_0518	hypothetical protein SPD_0518	0.45448	3.48e-07
SP1152	SPD_1016	exonuclease RexA	0.453821	4.8e-09	L
SP0317	SPD_0289	keto-hydroxyglutarate-aldolase/keto-deoxy-phosphogluconate aldolase	0.452389	3.73e-08	G
SP1852	SPD_1633	galactose-1-phosphate uridylyltransferase	0.448576	8.66e-07	G
SP1258	SPD_1116		0.446791	7.93e-08
SP1452	SPD_1281	hypothetical protein SPD_1281	0.443526	1.39e-06
SP0323	SPD_0295	PTS system, IIB component	0.442326	3.77e-06	G
SP0871	SPD_0766	FeS assembly protein SufB	0.439386	4.33e-08	O
SP1860	SPD_1642	choline transporter (glycine betaine transport system permease protein)	0.437343	2.9e-08	M
SP2221	SPD_2048	cobalt transporter ATP-binding subunit	0.436144	1.63e-07	P
SP0869	SPD_0764	cysteine desulfurases, SufS subfamily protein	0.435698	1.78e-06	E
SP2203	SPD_2030	replicative DNA helicase	0.435122	2.16e-08	L
SP0922	SPD_0815	hydrolase, carbon-nitrogen family protein	0.43384	3.08e-07	R
SP1072	SPD_0957	DNA primase	0.433703	2.14e-08	L
SP1084	SPD_0970	methionine aminopeptidase	0.433074	4.51e-08	J
SP1743	SPD_1553	hypothetical protein SPD_1553	0.433074	4.03e-07	H
SP2210	SPD_2037	cysteine synthase A	0.426106	3.66e-06	E
SP1039	SPD_0920	hypothetical protein SPD_0920	0.422956	1.64e-06
SP1533	SPD_1362	hypothetical protein SPD_1362	0.420983	2.51e-07
SP0842	SPD_0736	pyrimidine-nucleoside phosphorylase	0.420758	2.56e-06	F
SP0320	SPD_0292	gluconate 5-dehydrogenase	0.415702	2.68e-06	I
SP0283	SPD_0263	PTS system, mannose-specific IIC component	0.414991	9.04e-08	G
SP0672	SPD_0584	GTP-binding protein HflX	0.41447	7.16e-08	R
SP2206	SPD_2033	ribosomal subunit interface protein	0.412576	8.41e-08	J
SP1361	SPD_1195	homoserine dehydrogenase	0.411034	8.17e-09	E
SP2223	SPD_2050	hypothetical protein SPD_2050	0.407646	3.32e-08	S
SP0673	SPD_0585	hypothetical protein SPD_0585	0.399704	4.56e-07	G
SP1003	SPD_0889	pneumococcal histidine triad protein D precursor	0.397066	9.5e-07
SP0591	SPD_0515	cysteinyl-tRNA synthetase	0.395539	1.88e-06	J
SP1357	SPD_1191	ABC transporter, ATP-binding/permease protein	0.393039	1.87e-07	V
SP2012	SPD_1823	glyceraldehyde-3-phosphate dehydrogenase	0.392407	1.55e-07	G
SP0122	SPD_0131	hypothetical protein SPD_0131	0.391994	6.84e-07	S
SP0825	SPD_0721	methylenetetrahydrofolate dehydrogenase/methenyltetrahydrofolate cyclohydrolase	0.391319	1.15e-07	H
SP1375	SPD_1209	3-dehydroquinate synthase	0.390676	6.34e-08	E
SP1127	SPD_1010	hypothetical protein SPD_1010	0.388603	7.6e-07	S
SP0711	SPD_0618	amino acid ABC transporter, permease protein	0.387283	1.97e-06	E
SP0844	SPD_0738	cytidine deaminase	0.384866	1.77e-06	F
SP0614	SPD_0534	tributyrin esterase	0.37801	5.51e-07	R
SP0005	SPD_0005	peptidyl-tRNA hydrolase	0.374065	1.11e-06	J
SP1229	SPD_1087	formate--tetrahydrofolate ligase	0.368667	2.92e-06	F
SP0784	SPD_0685	glutathione reductase	0.359787	4.41e-07	C
SP1792	SPD_1666		0.356647	2.74e-07
SP2222	SPD_2049	CDP-diacylglycerol--glycerol-3-phosphate 3-phosphatidyltransferase	0.354122	4.13e-07	I
SP1034	SPD_0917	iron-compound ABC transporter, permease protein	0.353278	8.69e-07	P
SP0592	SPD_0516	hypothetical protein SPD_0516	0.347542	3.51e-07	S
SP2218	SPD_2045	rod shape-determining protein MreC	0.343803	2e-06	M
SP1360	SPD_1194	homoserine kinase	0.34246	5.05e-08	E
SP0815	SPD_0714	hypothetical protein SPD_0714	0.341757	3.9e-06
SP1845	SPD_1626	exodeoxyribonuclease III	0.337097	4.31e-08	L
SP1128	SPD_1012	phosphopyruvate hydratase	0.33415	2.22e-07	G
SP1576	SPD_1406	homoserine O-succinyltransferase	0.332246	3.82e-07	E
SP1664	SPD_1477	YlmF protein	0.331897	8.66e-07	S
SPD_0322_3	SPD_0322	glycosyl transferase, group 1 family protein	0.325705	2.1e-07	M
SP1192	SPD_1052	galactose-6-phosphate isomerase subunit LacB	0.324965	2.24e-06	G
SP2204	SPD_2031	50S ribosomal protein L9	0.322828	3.8e-06	J
SP0375	SPD_0343	6-phosphogluconate dehydrogenase	0.318347	6.38e-07	G
SP1421	SPD_1251	nicotinate phosphoribosyltransferase	0.318327	3.11e-07	H
SP1255	SPD_1113	3-isopropylmalate dehydratase small subunit, putative	0.318234	2.27e-06	E
SP1575	SPD_1405	hypothetical protein SPD_1405	0.3176	3.67e-06	L
SP1180	SPD_1043	ribonucleotide-diphosphate reductase subunit beta	0.314647	1.85e-07	F
SP0524	SPD_0466	hypothetical protein SPD_0466	0.301546	1.52e-06
SP1151	SPD_1015	ATP-dependent exonuclease RexB	0.301405	3.25e-06	L
SP0011	SPD_0011	tRNA(Ile)-lysidine synthetase	0.294754	2.13e-06	D
SP0665	SPD_0578	para-aminobenzoate synthase, component I	0.290669	2.37e-06	E
SP1374	SPD_1208	chorismate synthase	0.290614	2.42e-06	E
SP1225	SPD_1083	vicX protein	0.288015	4.33e-07	R
SP1960	SPD_1758	DNA-directed RNA polymerase subunit beta'	0.281501	2.07e-06	K
SP2136	SPD_1965	choline binding protein PcpA	0.280193	2.2e-06	R
SP0824	SPD_0720	amino acid ABC transporter, ATP-binding protein	0.268546	3.61e-06	E
SP0590	SPD_0514	acetyltransferase, GNAT family protein	0.258652	5.17e-07	R
SP1559	SPD_1390	phosphoglucomutase/phosphomannomutase family protein	0.252967	1.28e-06	G
SP0095	SPD_0091	hypothetical protein SPD_0091	-0.248087	1.08e-06	R
SP0058	SPD_0064	transcriptional regulator, GntR family protein	-0.249126	3.75e-06	K
SP0220	SPD_0204	50S ribosomal protein L24	-0.259474	3.81e-06	J
SP1925	SPD_1728	hypothetical protein SPD_1728	-0.273876	2.75e-06
SP1702	SPD_1512	preprotein translocase subunit SecA	-0.277407	7.26e-07	U
SP1208	SPD_1068	uridine kinase	-0.285355	7.77e-07	F
SP1272	SPD_1128	polysaccharide biosynthesis protein, putative	-0.291545	3.61e-06	R
SP2040	SPD_1849	protein jag (SpoIIIJ-associated protein ), putative	-0.297727	3.28e-06	R
SP1922	SPD_1725	hypothetical protein SPD_1725	-0.309898	1.64e-06	S
SP0227	SPD_0210	30S ribosomal protein S5	-0.310754	1.14e-07	J
SP1973	SPD_1771	SpoU rRNA methylase family protein	-0.313148	3.17e-06	J
SP1291	SPD_1146	Cof family protein	-0.315601	3.58e-06	R
SP1601	SPD_1426	hypothetical protein SPD_1426	-0.316922	2.36e-07
SP2102	SPD_1928	hypothetical protein SPD_1928	-0.318011	1.21e-06
SP0791	SPD_0693	oxidoreductase, aldo/keto reductase family protein	-0.319048	1.49e-06	R
SP0425	SPD_0388	acetyl-CoA carboxylase biotin carboxylase subunit	-0.31952	1.01e-07	I
SP0200	SPD_0186	competence-induced protein Ccs4	-0.319824	2.44e-07
SP0740	SPD_0644	MutT/nudix family protein	-0.322907	2.75e-06	F
SP1297	SPD_1152	flavodoxin	-0.323648	1.62e-06	C
SP1588	SPD_1415	pyridine nucleotide-disulfide oxidoreductase	-0.327403	1.16e-07	C
SP0208	SPD_0192	30S ribosomal protein S10	-0.328887	6.2e-07	J
SP1149	SPD_0716	IS630-Spn1, transposase Orf1	-0.333471	3.99e-08	L
SP2041	SPD_1850	SpoIIIJ family protein	-0.337146	2.86e-06	U
SP0681	SPD_0593	elongation factor Tu family protein	-0.337344	1.98e-06	T
SP0420	SPD_0383	acyl-carrier-protein S-malonyltransferase	-0.340343	1.61e-07	I
SP0226	SPD_0209	50S ribosomal protein L18	-0.343673	1.32e-07	J
SP0961	SPD_0849	50S ribosomal protein L20	-0.345008	1.11e-06	J
SP1597	SPD_1422	hypothetical protein SPD_1422	-0.345246	1.46e-06	S
SP0718	SPD_0624	thiamine-phosphate pyrophosphorylase	-0.349122	1.13e-06	H
SP2225	SPD_2052	hypothetical protein SPD_2052	-0.349491	1.34e-07	R
SP0004	SPD_0004	translation-associated GTPase	-0.350048	2.79e-07	J
SP0421	SPD_0384	3-ketoacyl-(acyl-carrier-protein) reductase	-0.350766	1.68e-08	I
SP0525	SPD_0467	BlpS protein	-0.354169	1.49e-06	K
SP1959	SPD_1757	nucleoside diphosphate kinase	-0.355799	3.84e-07	F
SP0851	SPD_0745	putative glycerol-3-phosphate acyltransferase PlsY	-0.356794	3.39e-06	S
SP1810	SPD_1595	hypothetical protein SPD_1595	-0.360009	1.66e-07
SP0079	SPD_0077	potassium uptake protein, Trk family protein	-0.360487	1.45e-07	P
SP0564	SPD_0490	hypothetical protein SPD_0490	-0.363266	1.11e-06
SP1924	SPD_1727	hypothetical protein SPD_1727	-0.364118	6.34e-07
SP0473	SPD_0423	ROK family protein	-0.364503	2.58e-06	K
SP0370	SPD_0337	Holliday junction-specific endonuclease	-0.365727	8.81e-07	R
SP2214	SPD_2041	elongation factor Ts	-0.366029	2.15e-07	J
SP0838	SPD_0732	30S ribosomal protein S20	-0.366976	1.63e-06	J
SP1102	SPD_0987	hypothetical protein SPD_0987	-0.367998	1.65e-06	S
SP1045	SPD_0926	hypothetical protein SPD_0926	-0.374593	9.48e-07	I
SP0181	SPD_0172	hypothetical protein SPD_0172	-0.375323	1.99e-07
SP0962	SPD_0850	lactoylglutathione lyase	-0.375981	8.24e-07	E
SP0424	SPD_0387	(3R)-hydroxymyristoyl-ACP dehydratase	-0.377621	3.38e-08	I
SP1182	SPD_1044	lactose phosphotransferase system repressor	-0.378149	1.12e-08	K
SP2097	SPD_1923	2,3,4,5-tetrahydropyridine-2-carboxylate N-succinyltransferase, putative	-0.383437	1.07e-06	E
SP0974	SPD_0861	preprotein translocase subunit SecG	-0.387262	1.39e-06	U
SP1263	SPD_1120	DNA topoisomerase I	-0.38758	1.53e-07	L
SP0088	SPD_0086	hypothetical protein SPD_0086	-0.387824	7.99e-08
SP1307	SPD_1159	hypothetical protein SPD_1159	-0.38959	6.76e-07
SP0266	SPD_0248	D-fructose-6-phosphate amidotransferase	-0.390464	1.57e-06	M
SP0480	SPD_0430	potassium transporter peripheral membrane component	-0.391068	2.67e-06	P
SP1231	SPD_1089	phosphopantothenoylcysteine decarboxylase	-0.39221	3.48e-06	H
SP0682	SPD_0594	hypothetical protein SPD_0594	-0.396161	1.02e-06
SP0422	SPD_0385	3-oxoacyl-(acyl carrier protein) synthase II	-0.400433	4.21e-08	I
SP1355	SPD_1188	50S ribosomal protein L10	-0.401802	2.46e-06	J
SP0118	SPD_0127	tRNA (5-methylaminomethyl-2-thiouridylate)-methyltransferase	-0.403237	2.05e-07	J
SP0762	SPD_0664	S-adenosylmethionine synthetase	-0.406744	1.71e-08	H
SP0012	SPD_0012	hypoxanthine-guanine phosphoribosyltransferase	-0.407894	1.55e-07	F
SP0366	SPD_0334	oligopeptide ABC transporter, oligopeptide-binding protein AliA	-0.411264	1.67e-07	E
SP0415	SPD_0378	enoyl-CoA hydratase	-0.411733	2.13e-07	I
SP0771	SPD_0672	peptidyl-prolyl cis-trans isomerase, cyclophilin-type	-0.413015	2.88e-06	O
SP1963	SPD_1761	CBS domain-containing protein	-0.414496	2.1e-07	R
SP2010	SPD_1821	penicillin-binding protein 2A	-0.418924	1.75e-07	M
SP0488	SPD_0437	hypothetical protein SPD_0437	-0.420515	3.6e-07	S
SP0787	SPD_0688	hypothetical protein SPD_0688	-0.424382	1.72e-08	V
SP1859	SPD_1640	nicotinamide mononucleotide transporter PnuC, putative	-0.426836	4.21e-07	H
SP0085	SPD_0083	30S ribosomal protein S4	-0.427583	2.25e-08	J
SP0626	SPD_0546	branched-chain amino acid transport system II carrier protein	-0.427758	5.04e-08	E
SP0141	SPD_0144	transcriptional regulator	-0.429872	9.55e-07
SP2027	SPD_1836	hypothetical protein SPD_1836	-0.433845	8.12e-09	S
SP2028	SPD_1837	phosphotyrosine protein phosphatase	-0.435503	2.46e-08	T
SP1232	SPD_1090	hypothetical protein SPD_1090	-0.436605	2.65e-08	S
SP0423	SPD_0386	acetyl-CoA carboxylase biotin carboxyl carrier protein subunit	-0.437184	2.78e-08	I
SP0178	SPD_0169	riboflavin biosynthesis protein RibD	-0.438371	3.79e-07	H
SP0246	SPD_0230	transcriptional regulator, DeoR family protein	-0.440365	4.05e-07	K
SP0417	SPD_0380	3-oxoacyl-(acyl carrier protein) synthase III	-0.441517	1.65e-09	I
SP0925	SPD_0817	hypothetical protein SPD_0817	-0.444256	7.11e-08	R
SP1634	SPD_1447	hypothetical protein SPD_1447	-0.446105	3.01e-07	R
SP1163	SPD_1027	acetoin dehydrogenase, E1 component, beta subunit, putative	-0.453113	1.45e-07	C
SP1823	SPD_1606	MgtC/SapB family protein	-0.455875	2.62e-06	S
SP2126	SPD_1956	dihydroxy-acid dehydratase	-0.457998	1.33e-08	E
SP0986	SPD_0872	hypothetical protein SPD_0872	-0.459099	1.72e-08	S
SP0582	SPD_0507	hypothetical protein SPD_0507	-0.465417	1.08e-08	S
SP0102	SPD_0098	glycosyl transferase, group 2 family protein	-0.467799	3.59e-08	M
SP1674	SPD_1487	phosphosugar-binding transcriptional regulator, putative	-0.468206	6.74e-09	K
SP1356	SPD_1190	chlorohydrolase	-0.472044	5.4e-09	F
SP1249	SPD_1107	guanosine 5'-monophosphate oxidoreductase	-0.4731	6.16e-07	F
SP0180	SPD_0171	DNA-3-methyladenine glycosylase I	-0.477284	3.08e-08	L
SP1598	SPD_1423	phosphomethylpyrimidine kinase	-0.477621	1.63e-07	H
SP0608	SPD_0529	amino acid ABC transporter, permease protein	-0.479208	1.79e-06	E
SP1438	SPD_1267	ABC transporter, ATP-binding protein	-0.479886	7.32e-07	R
SP0101	SPD_0097	transporter, putative	-0.481062	6.93e-08	P
SP1849	SPD_1630	hypothetical protein SPD_1630	-0.481828	1.66e-07
SP1870	SPD_1650	iron-compound ABC transporter, permease protein	-0.483139	7.78e-08	P
SP1871	SPD_1651	iron-compound ABC transporter, ATP-binding protein	-0.488265	3.14e-07	P
SP1230	SPD_1088	phosphopantothenate--cysteine ligase	-0.489868	2.58e-08	H
SP0205	SPD_0190	anaerobic ribonucleoside-triphosphate reductase activating protein	-0.490079	4.07e-08	O
SP1599	SPD_1424	tRNA pseudouridine synthase A	-0.493342	1.18e-08	J
SP0179	SPD_0170	Holliday junction DNA helicase motor protein	-0.497635	8.5e-08	L
SP2062	SPD_1872		-0.499553	6.02e-08
SP1539	SPD_1368	30S ribosomal protein S18	-0.506917	1.51e-09	J
SP0206	SPD_0191	hypothetical protein SPD_0191	-0.507045	1.53e-06	F
SP2175	SPD_2004	protein DltB	-0.509144	6.65e-08	M
SP0610	SPD_0531		-0.509594	6.42e-08
SP0549	SPD_0476	hypothetical protein SPD_0476	-0.509733	4.85e-09	M
SP2226	SPD_2053	hypothetical protein SPD_2053	-0.509886	1.99e-08	S
SP2177	SPD_2006	hypothetical protein SPD_2006	-0.510006	2.65e-07
SP0145	SPD_0148	transporter, major facilitator family protein	-0.51259	1.08e-07
SP2173	SPD_2002	undecaprenol-phosphate-poly(glycerophosphate subunit) D-alanine transfer protein	-0.512854	4e-08	M
SP1354	SPD_1187	50S ribosomal protein L7/L12	-0.513141	3.39e-07	J
SP0790	SPD_0692	hypothetical protein SPD_0692	-0.515934	8.99e-08
SP0446	SPD_0405	acetolactate synthase 3 regulatory subunit	-0.5177	2.99e-09	E
SP2176	SPD_2005	D-alanine--D-alanyl carrier protein ligase	-0.518595	5.44e-09	Q
SP0550	SPD_0477	tRNA (guanine-N(7))-methyltransferase	-0.522105	1.3e-08	R
SP2186	SPD_2013	glycerol kinase	-0.522254	3.61e-08	C
SP0606	SPD_0527	oxidoreductase, putative	-0.524329	5.49e-08	P
SP2111	SPD_1937	maltodextrose utilization protein MalA	-0.528126	6.46e-09	S
SP0202	SPD_0187	anaerobic ribonucleoside triphosphate reductase	-0.529815	2.67e-09	F
SP2216	SPD_2043	secreted 45 kDa protein precursor	-0.530488	1.51e-09	S
SP0798	SPD_0701	DNA-binding response regulator CiaR	-0.531013	1.75e-09	T
SP2007	SPD_1819	transcription antitermination protein NusG	-0.531445	3.58e-08	K
SP1858	SPD_1639	transcriptional regulator, TetR family protein	-0.533844	1.86e-08	K
SP0157	SPD_0159	hypothetical protein SPD_0159	-0.537333	2.23e-08
SP0142	SPD_0145	hypothetical protein SPD_0145	-0.539344	5.72e-08
SP0189	SPD_0178	transcriptional regulator Spx	-0.541969	4.14e-09	P
SP0799	SPD_0702	sensor histidine kinase CiaH	-0.543367	2.11e-09	T
SP1269	SPD_1125	choline kinase	-0.546448	1.16e-06	M
SP0650	SPD_0564	hypothetical protein SPD_0564	-0.547186	3.73e-07
SP0207	SPD_0191	hypothetical protein SPD_0191	-0.549184	3.64e-08	F
SP2112	SPD_1938	maltose operon transcriptional repressor	-0.550706	1.79e-09	K
SP1624	SPD_1437	acyltransferase domain-containing protein	-0.550815	1.06e-08	I
SP0630	SPD_0550	50S ribosomal protein L11	-0.552603	1.21e-09	J
SP0418	SPD_0381	acyl carrier protein	-0.55726	8.48e-10
SP0024	SPD_0030	hypothetical protein SPD_0030	-0.559031	4.22e-10	P
SP1572	SPD_1402	non-heme iron-containing ferritin	-0.561467	9.61e-09	P
SP0609	SPD_0530	amino acid ABC transporter, amino acid-binding protein	-0.562203	1.83e-08	E
SP1786	SPD_1577	hypothetical protein SPD_1577	-0.56447	1.69e-08	S
SP1382	SPD_1215	cytoplasmic alpha-amylase	-0.565227	2.74e-08	G
SP2197	SPD_2025	ABC transporter, substrate-binding protein, putative	-0.565479	1.22e-09	P
SP0026	SPD_0031	hypothetical protein SPD_0031	-0.565821	3.79e-10	S
SP0293	SPD_0273	hypothetical protein SPD_0273	-0.566026	9.26e-09
SP0669	SPD_0581	thymidylate synthase	-0.567422	1.32e-09	F
SP2215	SPD_2042	30S ribosomal protein S2	-0.568845	5.61e-07	J
SP0599	SPD_0521	ABC transporter, transmembrane protein Vexp1	-0.569099	2.24e-08	M
SP0237	SPD_0219	50S ribosomal protein L17	-0.576908	9.54e-10	J
SP1552	SPD_1384	cation efflux family protein	-0.578474	9.48e-08	P
SP1872	SPD_1652	iron-compound ABC transporter, iron-compound-binding protein	-0.578861	1.5e-06	P
SP1264	SPD_1121	hypothetical protein SPD_1121	-0.579154	1.75e-07	S
SP1970	SPD_1768	asparagine synthetase AsnA	-0.581429	1.04e-09	E
SP2228	SPD_2055	inositol-5-monophosphate dehydrogenase	-0.581582	2.01e-08	F
SP1268	SPD_1124	protein LicB	-0.582867	1.7e-08
SP0800	SPD_0703	hypothetical protein SPD_0703	-0.584037	6.55e-07
SP1393	SPD_1225	hypothetical protein SPD_1225	-0.585368	1.09e-08	K
SP2054	SPD_1864	hypothetical protein SPD_1864	-0.585793	2.8e-10	S
SP2198	SPD_2026	ABC transporter, permease protein	-0.603126	8.66e-10	P
SP0600	SPD_0522	ABC transporter, ATP-binding protein Vexp2	-0.606241	7.16e-09	V
SP1164	SPD_1028	TPP-dependent acetoin dehydrogenase alpha-subunit	-0.607639	1.39e-09	C
SP0557	SPD_0483	ribosome-binding factor A	-0.609221	1.39e-06	J
SP0447	SPD_0406	ketol-acid reductoisomerase	-0.609762	1.03e-10	E
SP0915	SPD_1342	IS1239, transposase, putative	-0.609807	1.4e-09	L
SP0607	SPD_0528	amino acid ABC transporter, permease protein	-0.611354	9.2e-09	E
SP1267	SPD_1123	CTP:phosphocholine cytidylyltransferase	-0.613149	1.13e-09	M
SP0426	SPD_0389	acetyl-CoA carboxylase subunit beta	-0.614525	1.68e-11	I
SP0617	SPD_0537	hypothetical protein SPD_0537	-0.619555	1.28e-07	O
SP1394	SPD_1226	amino acid ABC transporter, amino acid-binding protein	-0.62732	2.4e-06	E
SP2196	SPD_2024	ABC transporter, ATP-binding protein	-0.627468	1.8e-08	P
SP1012	SPD_0898	hypothetical protein SPD_0898	-0.632909	1.35e-10	S
SP0308	SPD_0281	cellobiose phosphotransferase system IIA component	-0.634924	3.18e-07	G
SP1586	SPD_1413	ATP-dependent RNA helicase, putative	-0.656302	8.21e-08	L
SP1433	SPD_1262	transcriptional regulator, AraC family protein	-0.662318	1e-08	K
SP0448	SPD_0407	hypothetical protein SPD_0407	-0.683178	8.14e-08
SP0861	SPD_0754	hypothetical protein SPD_0754	-0.686348	9.75e-09
SP0783	SPD_0684	biotin synthase (BioY family protein), putative	-0.690923	2.84e-09	R
SP1869	SPD_1649	iron-compound ABC transporter, permease protein	-0.696137	2.45e-09	P
SP0578	SPD_0503	6-phospho-beta-glucosidase	-0.701212	3.21e-07	G
SP0075	SPD_0074	phosphorylase, Pnp/Udp family protein, putative	-0.701792	3.07e-10	F
SP1975	SPD_1773	OxaA-like protein precursor	-0.705291	6.46e-09	U
SP1271	SPD_1127	2-C-methyl-D-erythritol 4-phosphate cytidylyltransferase	-0.724111	4.83e-11	I
SP1284	SPD_1139	LemA protein	-0.739881	1.85e-11	S
SP0631	SPD_0551	50S ribosomal protein L1	-0.740439	5.41e-10	J
SP0981	SPD_0868	foldase protein PrsA	-0.740779	1.83e-12	O
SP2058	SPD_1868	queuine tRNA-ribosyltransferase	-0.746679	1.92e-06	J
SP1914	SPD_1717	hypothetical protein SPD_1717	-0.748908	3.89e-10
SP1778	SPD_1569	aquaporin	-0.75469	1.7e-11	G
SP1283	SPD_1138	heat shock protein HtpX	-0.755762	2.68e-12	O
SP1010	SPD_0896	large conductance mechanosensitive channel protein MscL	-0.763098	1.18e-09	M
SP1501	SPD_1329	amino acid ABC transporter, ATP-binding protein	-0.765159	3.24e-08	E
SP0450	SPD_0409	threonine dehydratase	-0.766301	1.71e-11	E
SP0427	SPD_0390	acetyl-CoA carboxylase subunit alpha	-0.79048	9.71e-11	I
SP2185	SPD_2012	alpha-glycerophosphate oxidase	-0.796487	3.42e-10	C
SP1270	SPD_1126	alcohol dehydrogenase, zinc-containing	-0.797929	9.02e-12	E
SP2184	SPD_2011	glycerol uptake facilitator protein	-0.821649	4.03e-09	G
SP0182	SPD_0173	MccC family protein	-0.822044	3.23e-11	V
SP2088	SPD_1914	phosphate transport system regulatory protein PhoU	-0.822649	3.2e-07	P
SP1295	SPD_1150	CrcB protein	-0.823707	6.29e-12	D
SP0910	SPD_0803	hypothetical protein SPD_0803	-0.826632	2.37e-10	K
SP1502	SPD_1330	amino acid ABC transporter, permease protein	-0.833235	6.27e-10	E
SP1850	SPD_1631	Dam-replacing family protein	-0.845468	3.91e-11
SP1294	SPD_1149	CrcB protein	-0.851049	4.87e-12	D
SP1915	SPD_1718	hypothetical protein SPD_1718	-0.851587	2.33e-09	K
SP1293	SPD_1148	50S ribosomal protein L19	-0.85401	2.71e-08	J
SP2183	SPD_2010	hypothetical protein SPD_2010	-0.857882	1.39e-08
SP1626	SPD_1439	30S ribosomal protein S15	-0.862342	1.87e-10	J
SP2084	SPD_1910	phosphate ABC transporter, phosphate-binding protein	-0.86259	3.92e-06	P
SP2107	SPD_1933	4-alpha-glucanotransferase	-0.865078	2.4e-09	G
SPD_0087_3	SPD_0087	hypothetical protein SPD_0087	-0.86834	4.84e-09
SP1500	SPD_1328	amino acid ABC transporter, amino acid-binding protein	-0.90781	3.06e-07	E
SP0267	SPD_0249	hypothetical protein SPD_0249	-0.917648	2.69e-12	C
SP2239	SPD_2068	serine protease	-0.921134	6.11e-12	O
SP1296	SPD_1151	hypothetical protein SPD_1151	-0.923245	2.04e-11	E
SP0601	SPD_0523	ABC transporter, transmembrane protein Vexp3	-0.925456	1.02e-11
SP0338	SPD_0308	ATP-dependent Clp protease, ATP-binding subunit	-0.929839	2.57e-11	O
SP0449	SPD_0408	hypothetical protein SPD_0408	-0.948679	1.8e-11
SP2106	SPD_1932	maltodextrin phosphorylase	-1.01246	1.69e-10	G
SP0309	SPD_0282	hypothetical protein SPD_0282	-1.01261	7.24e-10
SP0408	SPD_0372	sodium:alanine symporter family protein	-1.01779	7.35e-13	E
SP1467	SPD_1296	glutamine amidotransferase subunit PdxT	-1.06819	1.72e-09	H
SP1468	SPD_1297	pyridoxine biosynthesis protein	-1.08807	1.31e-13	H
SP0371	SPD_0338	hypothetical protein SPD_0338	-1.0901	1.2e-08	S
SP2240	SPD_2069	SpoJ protein	-1.14236	7.55e-15	K
SP1695	SPD_1506	acetyl xylan esterase, putative	-1.15673	2.15e-12	Q
SP0742	SPD_0646	hypothetical protein SPD_0646	-1.1581	2.02e-12	S
SP0107	SPD_0104	LysM domain-containing protein	-1.1919	4.56e-14
SP2156	SPD_1984	hypersensitive-induced reaction protein 4	-1.19915	1.98e-13	O
SP0310	SPD_0283	cellobiose phosphotransferase system IIC component	-1.26794	1.2e-11	G
SP1857	SPD_1638	cation efflux system protein	-1.61192	2.08e-11	P
SP0303	SPD_0277	6-phospho-beta-glucosidase	-1.71804	3.62e-13	G
SP0879	SPD_0775	hypothetical protein SPD_0775	-1.74594	1.33e-15
SP1027	SPD_0913	hypothetical protein SPD_0913	-2.21212	0	S
a Values of ln-ratio. Positive values indicate upregulation and negative values indicate downregulation.
